# Supplementary material
Source: ML conference proceedings conference paper supplement (https://proceedings.neurips.cc/paper_files/paper/2022/hash/70596d70542c51c8d9b4e423f4bf2736-Abstract.html)
Supplement: Supplementary file 1 [file 70596d70542c51c8d9b4e423f4bf2736-Supplemental-Conference.zip]

Archive with 2 entries (2 files):
- Power_law_Coefficient_for_Representational_Quality_KK_AKM_AG_BAR_manuscript_appendix.pdf
- __MACOSX/._Power_law_Coefficient_for_Representational_Quality_KK_AKM_AG_BAR_manuscript_appendix.pdf
